# Supplementary material
Source: PubMed Central journal article supplement (PMC2141818)

**A**

```

Human Dup1      TGCATTGCCTTGTCCGTGTGTCGGGCTCTGTGTGACTGACGCCGAGCCCTTAGTCACTCTTACTATTCTCCCTTTTATCACTTGTCCCTTGAGTGTGGTTGT
Human Dup2      TGCATTGCCTTGTCCGTGTGTCGGGCTCTGTGTGACTGACGCCGAGCCCTTAGTCACTCTTACTATTCTCCCTTTTATCACTTGTCCCTTGAGTGTGGTTGT
Baboon Dup1    TGCATTGCCTTGTCCGTGTGTCGGGCTCTGTGTGACTGACGCCGAGCCCTTAGTCACTCTTACTATTCTCCCTTTTATCACTTGTCCCTTGAGTGTGGTTGT
Baboon Dup2    TGCATTGCCTTGTCCGTGTGTCGGGCTCTGTGTGACTGACGCCGAGCCCTTAGTCACTCTTACTATTCTCCCTTTTATCACTTGTCCCTTGAGTGTGGTTGT
Marmoset Dup1  TGCATTGCCTTGTCCGTGTGTCGGGCTCTGTGTGACTGACGCCGAGCCCTTAGTCACTCTTACTATTCTCCCTTTTATCACTTGTCCCTTGAGTGTGGTTGT
Marmoset Dup2  TGCATTGCCTTGTCCGTGTGTCGGGCTCTGTGTGACTGACGCCGAGCCCTTAGTCACTCTTACTATTCTCCCTTTTATCACTTGTCCCTTGAGTGTGGTTGT
Owl monkey Dup1 TGCATTGCCTTGTCCGTGTGTCGGGCTCTGTGTGACTGACGCCGAGCCCTTAGTCACTCTTACTATTCTCCCTTTTATCACTTGTCCCTTGAGTGTGGTTGT
Owl monkey Dup2 TGCATTGCCTTGTCCGTGTGTCGGGCTCTGTGTGACTGACGCCGAGCCCTTAGTCACTCTTACTATTCTCCCTTTTATCACTTGTCCCTTGAGTGTGGTTGT
Mouse lemur Dup1 TGCATTGCCTTGTCCGTGTGTCGGGCTCTGTGTGACTGACGCCGAGCCCTTAGTCACTCTTACTATTCTCCCTTTTATCACTTGTCCCTTGAGTGTGGTTGT
Mouse lemur Dup2 TGCATTGCCTTGTCCGTGTGTCGGGCTCTGTGTGACTGACGCCGAGCCCTTAGTCACTCTTACTATTCTCCCTTTTATCACTTGTCCCTTGAGTGTGGTTGT
Galago Dup1    TGCATTGCCTTGTCCGTGTGTCGGGCTCTGTGTGACTGACGCCGAGCCCTTAGTCACTCTTACTATTCTCCCTTTTATCACTTGTCCCTTGAGTGTGGTTGT
Galago Dup2    TGCATTGCCTTGTCCGTGTGTCGGGCTCTGTGTGACTGACGCCGAGCCCTTAGTCACTCTTACTATTCTCCCTTTTATCACTTGTCCCTTGAGTGTGGTTGT
Rabbit Dup1    TGCATTGCCTTGTCCGTGTGTCGGGCTCTGTGTGACTGACGCCGAGCCCTTAGTCACTCTTACTATTCTCCCTTTTATCACTTGTCCCTTGAGTGTGGTTGT
Rabbit Dup2    TGCATTGCCTTGTCCGTGTGTCGGGCTCTGTGTGACTGACGCCGAGCCCTTAGTCACTCTTACTATTCTCCCTTTTATCACTTGTCCCTTGAGTGTGGTTGT
Cat Dup1       TGCATTGCCTTGTCCGTGTGTCGGGCTCTGTGTGACTGACGCCGAGCCCTTAGTCACTCTTACTATTCTCCCTTTTATCACTTGTCCCTTGAGTGTGGTTGT
Cat Dup2       TGCATTGCCTTGTCCGTGTGTCGGGCTCTGTGTGACTGACGCCGAGCCCTTAGTCACTCTTACTATTCTCCCTTTTATCACTTGTCCCTTGAGTGTGGTTGT
Dog Dup1       TGCATTGCCTTGTCCGTGTGTCGGGCTCTGTGTGACTGACGCCGAGCCCTTAGTCACTCTTACTATTCTCCCTTTTATCACTTGTCCCTTGAGTGTGGTTGT
Dog Dup2       TGCATTGCCTTGTCCGTGTGTCGGGCTCTGTGTGACTGACGCCGAGCCCTTAGTCACTCTTACTATTCTCCCTTTTATCACTTGTCCCTTGAGTGTGGTTGT
Bat Dup1       TGCATTGCCTTGTCCGTGTGTCGGGCTCTGTGTGACTGACGCCGAGCCCTTAGTCACTCTTACTATTCTCCCTTTTATCACTTGTCCCTTGAGTGTGGTTGT
Bat Dup2       TGCATTGCCTTGTCCGTGTGTCGGGCTCTGTGTGACTGACGCCGAGCCCTTAGTCACTCTTACTATTCTCCCTTTTATCACTTGTCCCTTGAGTGTGGTTGT
Elephant Dup1  TGCATTGCCTTGTCCGTGTGTCGGGCTCTGTGTGACTGACGCCGAGCCCTTAGTCACTCTTACTATTCTCCCTTTTATCACTTGTCCCTTGAGTGTGGTTGT
Elephant Dup2  TGCATTGCCTTGTCCGTGTGTCGGGCTCTGTGTGACTGACGCCGAGCCCTTAGTCACTCTTACTATTCTCCCTTTTATCACTTGTCCCTTGAGTGTGGTTGT

```

\* \* \* \* \* \* \* \* \* \* \* \* \* \* \* \* \* \* \* \* \* \* \* \* \* \* \* \* \* \* \* \* \* \* \* \* \* \* \* \* \* \* \* \* \* \* \* \*

**B**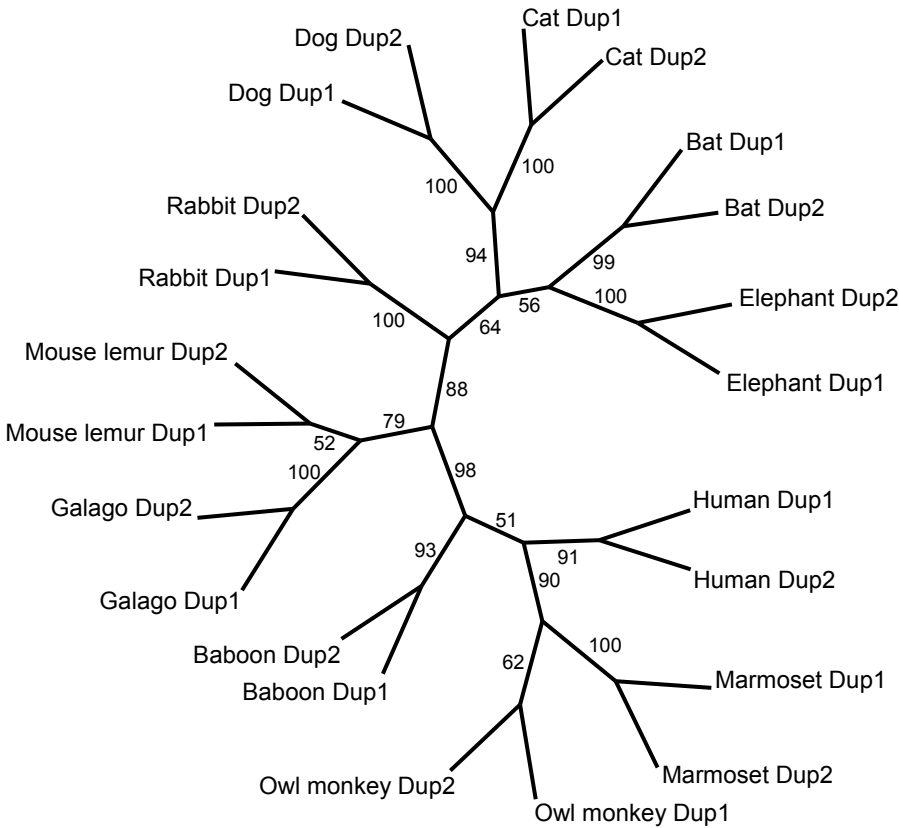**C**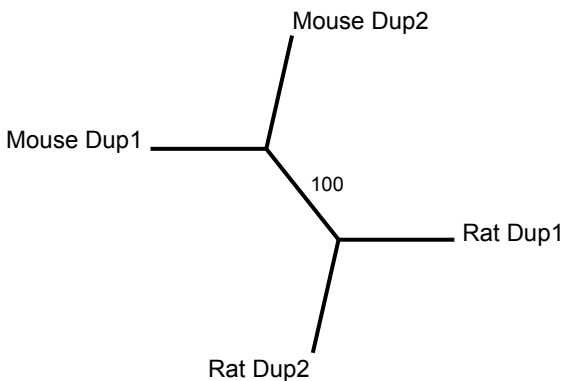

Supplement: pnas_0706604104_1.pdf [file pnas_0706604104_1.pdf]
